# Supplementary material
Source: MDPI journal article supplement (https://www.mdpi.com/2813-0618/1/3/10)

**Supplemental Table S1. ICD-9/10-CM codes for opioid use disorder, opioid overdose, and other comorbidities**

| Condition           | Version | Code                                                                                                                                                                                                                                   |
|---------------------|---------|----------------------------------------------------------------------------------------------------------------------------------------------------------------------------------------------------------------------------------------|
| Opioid use disorder | 9       | 304.00, 304.01, 304.02, 304.03, 304.70, 304.71, 304.72, 304.73, 305.50, 305.51, 305.52, 305.53                                                                                                                                         |
|                     | 10      | F11, F192                                                                                                                                                                                                                              |
| Opioid overdose     | 9       | 965.00, 965.01, 965.02, 965.09, E85.00, E85.01, E85.02                                                                                                                                                                                 |
|                     | 10      | T40.0, T40.1, T40.2, T40.3, T40.6 (excluding T406.06 and T40.696)                                                                                                                                                                      |
| Chronic pain        | 9       | 307.80, 307.89, 338.0, 338.2, 338.4, 719.41, 719.45-719.47, 719.49, 720.0, 720.2, 720.9, 721.0-721.4, 721.6, 721.8, 721.9, 722, 723.0, 723.1, 723.3-723.9, 724.0-724.6, 724.70, 724.79, 724.8, 724.9, 729.0-729.2, 729.4, 729.5        |
|                     | 10      | F45.4, M08.1, M25.50, M25.51, M25.55 - M25.57, M43.2-M43.6, M45, M46.1, M46.3, M46.4, M46.9, M47, M48.0, M48.1, M48.8, M48.9, M50.8, M50.9, M51, M53.1-M53.3, M53.8, M53.9, M54, M60.8, M60.9, M63.3, M79.0-M79.2, M79.6, M79.7, M96.1 |
| Depression          | 9       | 296.2, 296.3, 296.5, 300.4, 309, 311                                                                                                                                                                                                   |
|                     | 10      | F20.4, F31.3-F31.5, F32, F33, F34.1, F41.2, F43.2                                                                                                                                                                                      |
| Alcohol misuse      | 9       | 265.2, 291.1-291.3, 291.5-291.9, 303.0, 303.9, 305.0, 357.5, 425.5, 535.3, 571.0-571.3, 980, V11.3                                                                                                                                     |
|                     | 10      | E52, F10, G62.1, I42.6, K29.2, K70.0, K70.3, K70.9, T51, Z50.2, Z71.4, Z72.1                                                                                                                                                           |

**Supplemental Table S2. Results from sensitivity analysis with information being carried-forward for six additional 30-day intervals for those lost to follow-up among eligible and insured patients with opioid use disorder in the United States, 2010-2017**

| Parameter                                     | Endpoint              |                   |                    |
|-----------------------------------------------|-----------------------|-------------------|--------------------|
|                                               | First opioid overdose | Death             | Composite endpoint |
| Unadjusted model                              |                       |                   |                    |
| Total person-time, unit: person- year         | 74812.7               | 76286.8           | 74713.8            |
| Average follow-up time, unit: year            | 1.27                  | 1.30              | 1.27               |
| Number of events, n (%)                       | 1962 (3.33)           | 1330 (2.26)       | 3191 (5.42)        |
| HR (95% CI)                                   | 0.71 (0.57, 0.89)     | 0.17 (0.10, 0.29) | 0.50 (0.41, 0.61)  |
| Marginal structural model                     |                       |                   |                    |
| Weighted total person-time, unit: person-year | 75417.98              | 77018.31          | 75360.20           |
| Average weighted follow-up time, unit: year   | 1.28                  | 1.31              | 1.28               |
| Weighted number of events                     | 1955                  | 1318              | 3163               |
| HR (95% CI)                                   | 0.73 (0.55, 0.96)     | 0.45 (0.22, 0.92) | 0.69 (0.53, 0.90)  |

**Supplemental Table S3. Estimated hazard ratios (HRs) with 95% confidence intervals (CIs) of measured baseline variables on each of the three outcomes among eligible and insured patients with opioid use disorder in the United States, 2010-2017**

| Baseline variables                           | Overdose             | Death                | Composite            |
|----------------------------------------------|----------------------|----------------------|----------------------|
|                                              | HR (95% CI)          | HR (95% CI)          | HR (95% CI)          |
| Age:<br>One year increase                    | 0.979 (0.976, 0.983) | 1.045 (1.039, 1.051) | 0.998 (0.995, 1.001) |
| Gender:<br>Female versus male                | 1.002 (0.909, 1.105) | 0.727 (0.639, 0.826) | 0.912 (0.842, 0.989) |
| History of opioid overdose:<br>Yes versus no | 2.932 (2.530, 3.397) | 2.336 (1.902, 2.868) | 2.712 (2.397, 3.070) |
| Region:<br>Midwest versus West               | 1.148 (0.995, 1.326) | 0.831 (0.673, 1.025) | 1.062 (0.936, 1.204) |
| Region:<br>Northeast versus West             | 0.966 (0.819, 1.139) | 1.252 (1.021, 1.535) | 1.045 (0.911, 1.199) |
| Region:<br>South versus West                 | 0.805 (0.710, 0.912) | 1.026 (0.882, 1.194) | 0.858 (0.772, 0.954) |
| Chronic pain:<br>Yes versus no               | 0.934 (0.823, 1.059) | 0.883 (0.718, 1.087) | 0.832 (0.744, 0.930) |
| Depression:<br>Yes versus no                 | 1.444 (1.302, 1.602) | 1.211 (1.062, 1.380) | 1.324 (1.217, 1.442) |
| Alcohol use disorder:<br>Yes versus no       | 0.986 (0.867, 1.121) | 1.608 (1.356, 1.907) | 1.131 (1.018, 1.257) |
| CCI:<br>One unit increase                    | 1.218 (1.186, 1.251) | 1.301 (1.264, 1.340) | 1.259 (1.234, 1.285) |

**Supplemental Figure S1.** Plot of adjusted cumulative incidence of opioid overdose versus time since opioid use disorder diagnosis (months) by time-varying Buprenorphine-Naloxone exposure status (yes versus no) among eligible and insured patients with opioid use disorder in the United States, 2010-2017

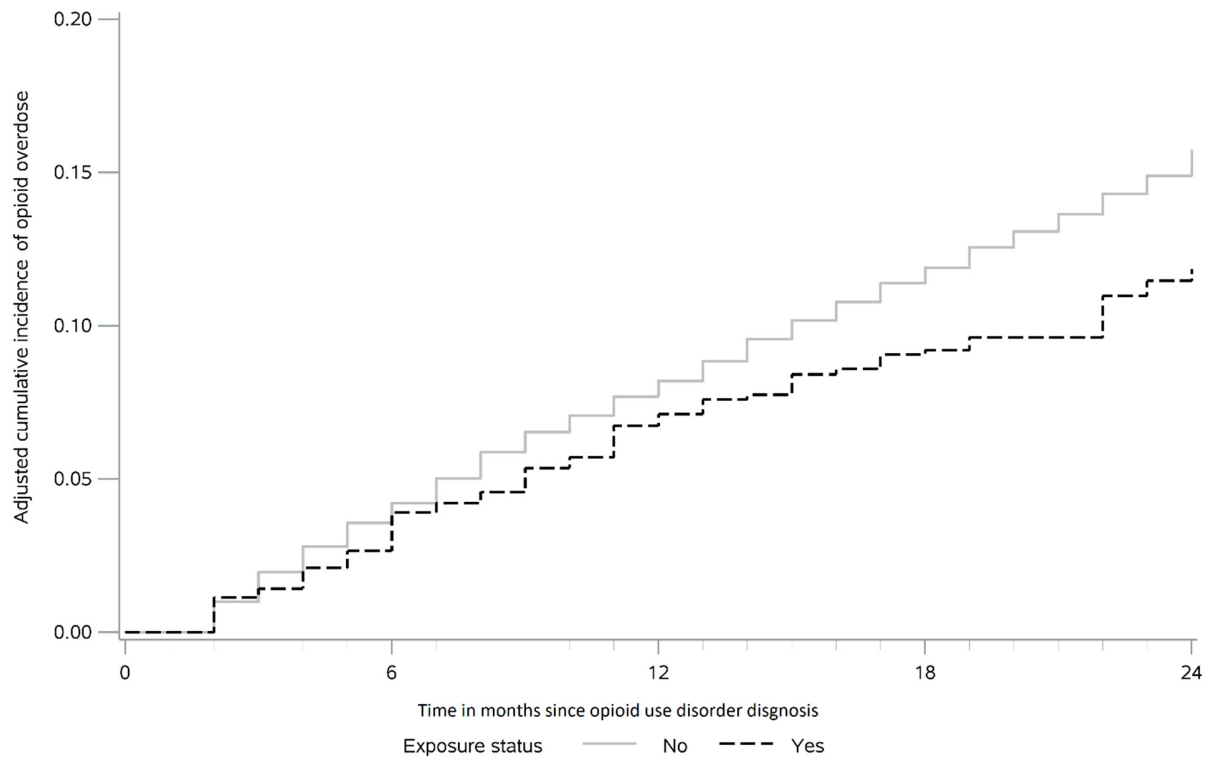

**Supplemental Figure S2** Plot of adjusted cumulative incidence of all-cause mortality versus time since opioid use disorder diagnosis (months) by time-varying Buprenorphine-Naloxone exposure status (yes versus no) among eligible and insured patients with opioid use disorder in the United States, 2010-2017

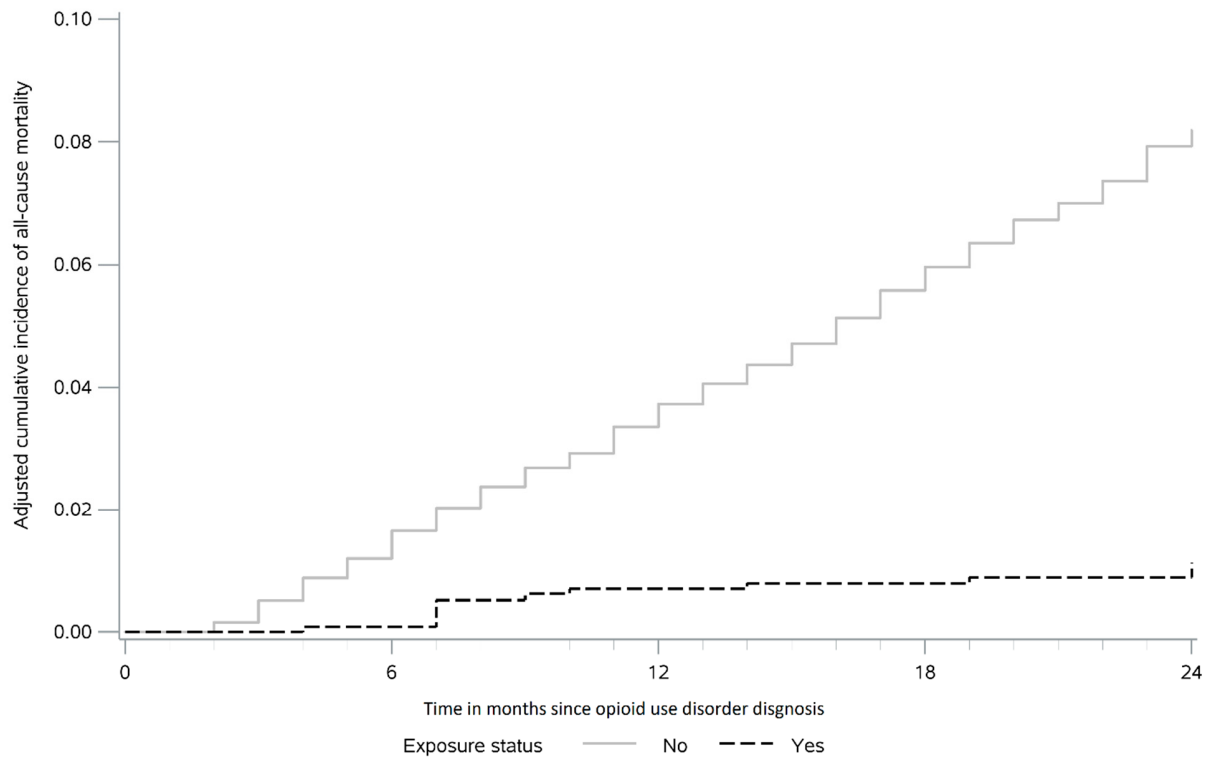

**Supplemental Figure S3** Plot of adjusted cumulative incidence of composite endpoint of opioid overdose and all-cause death versus time since opioid use disorder diagnosis (months) by time-varying Buprenorphine-Naloxone exposure status (yes versus no) among eligible and insured patients with opioid use disorder in the United States, 2010-2017

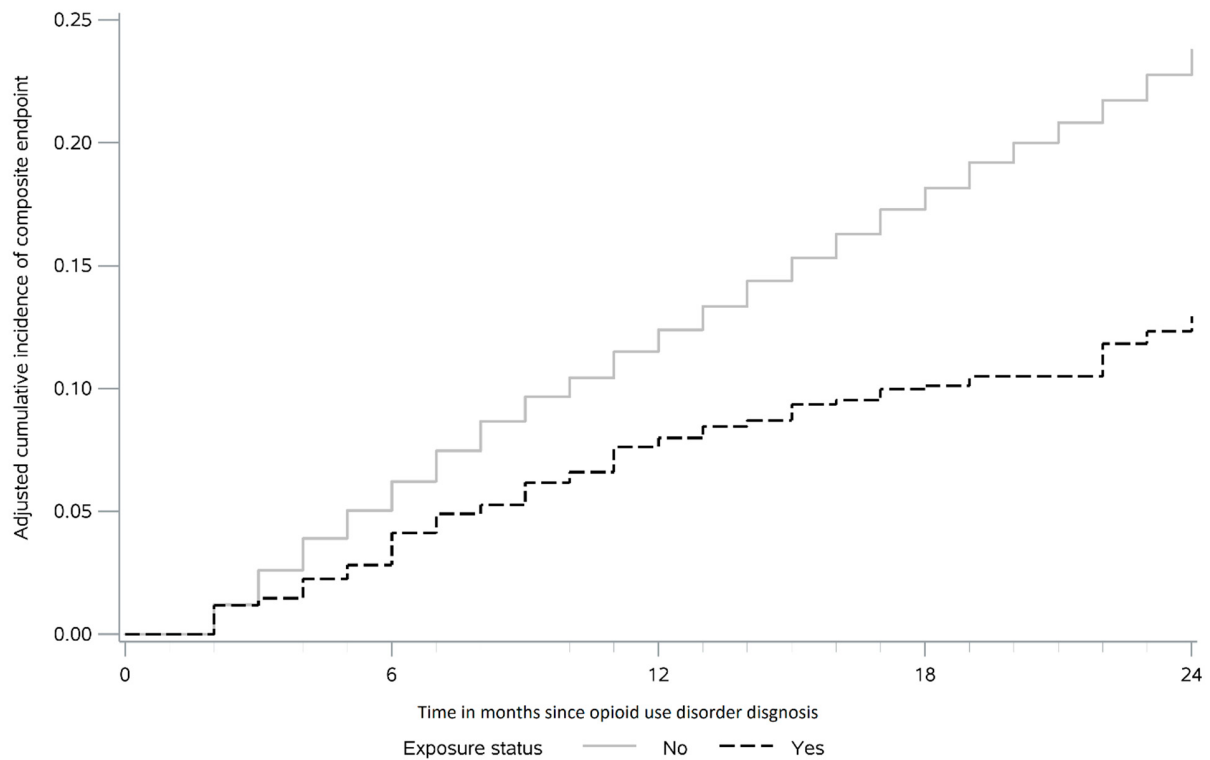

Supplement: s1 [file s1 › pharmacoepidemiology-1879460-supplementary.pdf]
